# Supplementary material
Source: publisher site journal article supplement (https://www.spandidos-publications.com/2975/downloadSupplementary)
Supplement: Supplementary file 1 [file downloadSupplementary]

## Sheet: Sheet1
List of TF-miRNAs regulatory pairs
TF	Target miRNA
JMJD1C	hsa-mir-302c
NANOG	hsa-mir-302c
POU5F1	hsa-mir-302c
PTEN	hsa-mir-302c
SMAD1	hsa-mir-302c
SMAD4	hsa-mir-302c
SOX2	hsa-mir-302c
ZFP42	hsa-mir-302c
AHR	hsa-mir-106b
ARNT	hsa-mir-106b
ATF4	hsa-mir-106b
E2F1	hsa-mir-106b
E2F3	hsa-mir-106b
JUN	hsa-mir-106b
MAX	hsa-mir-106b
MYC	hsa-mir-106b
MYCN	hsa-mir-106b
NFE2L2	hsa-mir-106b
TAZ	hsa-mir-106b
TEAD1	hsa-mir-106b
YAP1	hsa-mir-106b
CREB1	hsa-mir-302a
JMJD1C	hsa-mir-302a
NANOG	hsa-mir-302a
POU5F1	hsa-mir-302a
PTEN	hsa-mir-302a
SMAD1	hsa-mir-302a
SMAD4	hsa-mir-302a
SOX2	hsa-mir-302a
ZFP42	hsa-mir-302a
JMJD1C	hsa-mir-302d
NANOG	hsa-mir-302d
POU5F1	hsa-mir-302d
PTEN	hsa-mir-302d
SMAD1	hsa-mir-302d
SMAD4	hsa-mir-302d
SOX2	hsa-mir-302d
ZFP42	hsa-mir-302d
ATOH8	hsa-mir-221
BANP	hsa-mir-221
CBFB	hsa-mir-221
ESR1	hsa-mir-221
FOSL1	hsa-mir-221
GATA2	hsa-mir-221
HOXB7	hsa-mir-221
JUN	hsa-mir-221
MITF	hsa-mir-221
MYC	hsa-mir-221
MYCN	hsa-mir-221
NFKB2	hsa-mir-221
PBX2	hsa-mir-221
PDGF	hsa-mir-221
PSMD9	hsa-mir-221
RBPJ	hsa-mir-221
RELA	hsa-mir-221
RELB	hsa-mir-221
RUNX1	hsa-mir-221
RUNX1T1	hsa-mir-221
SNAI2	hsa-mir-221
SRSF1	hsa-mir-221
TP53	hsa-mir-221
ZBTB16	hsa-mir-221
BANP	hsa-mir-222
ESR1	hsa-mir-222
ETS1	hsa-mir-222
F2	hsa-mir-222
FOSL1	hsa-mir-222
HMGA1	hsa-mir-222
HOXB7	hsa-mir-222
JUN	hsa-mir-222
MITF	hsa-mir-222
MYC	hsa-mir-222
PBX2	hsa-mir-222
PRDM1	hsa-mir-222
PSMD9	hsa-mir-222
RBPJ	hsa-mir-222
RELA	hsa-mir-222
SNAI2	hsa-mir-222
SRSF1	hsa-mir-222
TP53	hsa-mir-222
ZBTB16	hsa-mir-222
JMJD1C	hsa-mir-302b
NANOG	hsa-mir-302b
POU5F1	hsa-mir-302b
PTEN	hsa-mir-302b
RARA	hsa-mir-302b
SMAD1	hsa-mir-302b
SMAD4	hsa-mir-302b
SOX2	hsa-mir-302b
ZFP42	hsa-mir-302b
AP-1	hsa-mir-206
KLF4	hsa-mir-206
MRF4	hsa-mir-206
MYF5	hsa-mir-206
MYOCD	hsa-mir-206
MYOD1	hsa-mir-206
MYOG	hsa-mir-206
NFE2L2	hsa-mir-206
NR1H3	hsa-mir-206
SRF	hsa-mir-206
TNFSF12	hsa-mir-206
E2F1	hsa-mir-106a
EGR1	hsa-mir-106a
ESR1	hsa-mir-106a
MAX	hsa-mir-106a
MITF	hsa-mir-106a
MYC	hsa-mir-106a
MYCN	hsa-mir-106a
RUNX1	hsa-mir-106a
SP1	hsa-mir-106a
TP53	hsa-mir-106a
DNMT3B	hsa-mir-217
EZH2	hsa-mir-217
NF1	hsa-mir-217
SUZ12	hsa-mir-217
TGFB1	hsa-mir-217
E2F1	hsa-mir-20b
EGR1	hsa-mir-20b
ESR1	hsa-mir-20b
MAX	hsa-mir-20b
MITF	hsa-mir-20b
MYC	hsa-mir-20b
MYCN	hsa-mir-20b
RUNX1	hsa-mir-20b
TP63	hsa-mir-519a
AHR	hsa-mir-93
ARNT	hsa-mir-93
ATF4	hsa-mir-93
E2F1	hsa-mir-93
JUN	hsa-mir-93
MAX	hsa-mir-93
MYC	hsa-mir-93
MYCN	hsa-mir-93
NFE2L2	hsa-mir-93
SP7	hsa-mir-93
TAZ	hsa-mir-93
TEAD1	hsa-mir-93
YAP1	hsa-mir-93
HNF4A	hsa-mir-381
TP53	hsa-mir-381
AR	hsa-mir-20a
BMPR1A	hsa-mir-20a
CCND1	hsa-mir-20a
CEBPB	hsa-mir-20a
E2F1	hsa-mir-20a
E2F2	hsa-mir-20a
E2F3	hsa-mir-20a
ELK1	hsa-mir-20a
ESR1	hsa-mir-20a
HES1	hsa-mir-20a
HIF1A	hsa-mir-20a
MAPK14	hsa-mir-20a
MAX	hsa-mir-20a
MNT	hsa-mir-20a
MXI1	hsa-mir-20a
MYC	hsa-mir-20a
MYCN	hsa-mir-20a
NANOG	hsa-mir-20a
NKX2-5	hsa-mir-20a
PIM1	hsa-mir-20a
RELA	hsa-mir-20a
RUNX1	hsa-mir-20a
SMAD3	hsa-mir-20a
SP1	hsa-mir-20a
SPI1	hsa-mir-20a
SREBF2	hsa-mir-20a
STAT3	hsa-mir-20a
TAF15	hsa-mir-20a
TFAP2A	hsa-mir-20a
TLX1	hsa-mir-20a
TLX3	hsa-mir-20a
TP53	hsa-mir-20a
AR	hsa-mir-18a
BMPR1A	hsa-mir-18a
CCND1	hsa-mir-18a
CEBPB	hsa-mir-18a
E2F1	hsa-mir-18a
E2F2	hsa-mir-18a
E2F3	hsa-mir-18a
ELK1	hsa-mir-18a
ESR1	hsa-mir-18a
HES1	hsa-mir-18a
MAPK14	hsa-mir-18a
MAX	hsa-mir-18a
MNT	hsa-mir-18a
MXI1	hsa-mir-18a
MYC	hsa-mir-18a
MYCN	hsa-mir-18a
NANOG	hsa-mir-18a
NKX2-5	hsa-mir-18a
PIM1	hsa-mir-18a
RELA	hsa-mir-18a
RUNX1	hsa-mir-18a
SMAD3	hsa-mir-18a
SP1	hsa-mir-18a
SPI1	hsa-mir-18a
SREBF2	hsa-mir-18a
STAT3	hsa-mir-18a
STAT5	hsa-mir-18a
TFAP2A	hsa-mir-18a
TLX1	hsa-mir-18a
TLX3	hsa-mir-18a
TP53	hsa-mir-18a
AR	hsa-mir-182
CDKN1A	hsa-mir-182
CEBPA	hsa-mir-182
CTNNB1	hsa-mir-182
DDX5	hsa-mir-182
ETS1	hsa-mir-182
HDAC2	hsa-mir-182
HIF1A	hsa-mir-182
HNF4A	hsa-mir-182
HSF2	hsa-mir-182
IL2	hsa-mir-182
KLF3	hsa-mir-182
KLF4	hsa-mir-182
LEF1	hsa-mir-182
MYCN	hsa-mir-182
MYOD1	hsa-mir-182
RELA	hsa-mir-182
SOX2	hsa-mir-182
SP1	hsa-mir-182
SREBF2	hsa-mir-182
STAT3	hsa-mir-182
STAT5	hsa-mir-182
ZEB1	hsa-mir-182
ELK1	hsa-mir-144
GATA1	hsa-mir-144
GATA4	hsa-mir-144
JUN	hsa-mir-144
NR1H4	hsa-mir-144
PAX4	hsa-mir-144
RUNX1	hsa-mir-144
TAL1	hsa-mir-144
HIF1A	hsa-mir-382
HNF4A	hsa-mir-382
E2F1	hsa-mir-16
E2F3	hsa-mir-16
E2F7	hsa-mir-16
ETS1	hsa-mir-16
MAX	hsa-mir-16
MYC	hsa-mir-16
NFKB1	hsa-mir-16
STAT5	hsa-mir-16
ZEB1	hsa-mir-16
ZEB2	hsa-mir-16
E2F1	hsa-mir-18b
ESR1	hsa-mir-18b
JUN	hsa-mir-18b
MAX	hsa-mir-18b
MITF	hsa-mir-18b
MYC	hsa-mir-18b
MYCN	hsa-mir-18b
RUNX1	hsa-mir-18b
ESR1	hsa-mir-497
HIF1A	hsa-mir-497
MYC	hsa-mir-497
MITF	hsa-mir-211
MMP9	hsa-mir-211
AGO2	hsa-mir-155
AKT1	hsa-mir-155
AP-1	hsa-mir-155
BCL6	hsa-mir-155
BCR	hsa-mir-155
BRCA1	hsa-mir-155
BRD4	hsa-mir-155
CAMP	hsa-mir-155
EED	hsa-mir-155
ELK3	hsa-mir-155
ETS1	hsa-mir-155
ETS2	hsa-mir-155
EZH2	hsa-mir-155
FOSB	hsa-mir-155
FOXP3	hsa-mir-155
HDAC2	hsa-mir-155
HDAC4	hsa-mir-155
HIF1A	hsa-mir-155
IRF1	hsa-mir-155
IRF3	hsa-mir-155
IRF4	hsa-mir-155
JUNB	hsa-mir-155
KMT2A	hsa-mir-155
MYB	hsa-mir-155
NFKB1	hsa-mir-155
NFKB3	hsa-mir-155
RBBP5	hsa-mir-155
RELA	hsa-mir-155
SMAD3	hsa-mir-155
SMAD4	hsa-mir-155
SMG-1	hsa-mir-155
SPI1	hsa-mir-155
STAT1	hsa-mir-155
STAT3	hsa-mir-155
STAT5	hsa-mir-155
TGFB1	hsa-mir-155
TP53	hsa-mir-155
TP63	hsa-mir-155
YY1	hsa-mir-155
CTNNB1	hsa-mir-150
DNMT1	hsa-mir-150
EIF2C2	hsa-mir-150
EP300	hsa-mir-150
HNF4A	hsa-mir-150
ITGB3	hsa-mir-150
KLF2	hsa-mir-150
KLF4	hsa-mir-150
LEF1	hsa-mir-150
LIN28A	hsa-mir-150
MYC	hsa-mir-150
MYOD1	hsa-mir-150
NFKB1	hsa-mir-150
RELA	hsa-mir-150
STAT3	hsa-mir-150
TP53	hsa-mir-150
E2F1	hsa-mir-195
E2F3	hsa-mir-195
EGR3	hsa-mir-195
HDAC3	hsa-mir-195
MYC	hsa-mir-195
SP1	hsa-mir-195
STAT5	hsa-mir-195
E2F1	hsa-mir-519d
TP53	hsa-mir-519d
CTNNB1	hsa-mir-372
HIF1A	hsa-mir-372
LEF1	hsa-mir-372
MYC	hsa-mir-372
TWIST1	hsa-mir-372
YY1	hsa-mir-372
CREB1	hsa-mir-373
CTNNB1	hsa-mir-373
HIF1A	hsa-mir-373
LEF1	hsa-mir-373
MBD2	hsa-mir-373
MYC	hsa-mir-373
SP1	hsa-mir-373
TWIST1	hsa-mir-373
MEF2A	hsa-mir-433
NR3B3	hsa-mir-433
SHP	hsa-mir-433
SMAD3	hsa-mir-433
TGFB1	hsa-mir-433
E2F1	hsa-mir-363
ESR1	hsa-mir-363
MAX	hsa-mir-363
MITF	hsa-mir-363
MYCN	hsa-mir-363
RUNX1	hsa-mir-363
NFKB1	hsa-mir-340
AHR	hsa-mir-25
ARNT	hsa-mir-25
ATF4	hsa-mir-25
E2F1	hsa-mir-25
E2F2	hsa-mir-25
E2F3	hsa-mir-25
E2F7	hsa-mir-25
JUN	hsa-mir-25
MAX	hsa-mir-25
MYC	hsa-mir-25
MYCN	hsa-mir-25
NFE2L2	hsa-mir-25
PTEN	hsa-mir-25
TAZ	hsa-mir-25
TEAD1	hsa-mir-25
YAP1	hsa-mir-25
E2F1	hsa-mir-7
E2F3	hsa-mir-7
E2F7	hsa-mir-7
ESR1	hsa-mir-7
ESR2	hsa-mir-7
FOXP3	hsa-mir-7
HOXD10	hsa-mir-7
SRSF1	hsa-mir-7
STAT1	hsa-mir-7
AML1	hsa-mir-223
CEBPA	hsa-mir-223
CEBPB	hsa-mir-223
DPF2	hsa-mir-223
E2F1	hsa-mir-223
HEY1	hsa-mir-223
NFIA	hsa-mir-223
NOTCH1	hsa-mir-223
NOTCH3	hsa-mir-223
PRDM1	hsa-mir-223
RELA	hsa-mir-223
RUNX1	hsa-mir-223
RUNX1T1	hsa-mir-223
SPI1	hsa-mir-223
TAL1	hsa-mir-223
TWIST1	hsa-mir-223
EGR1	hsa-mir-181d
MYCN	hsa-mir-181d
RUNX1	hsa-mir-181d
THRA	hsa-mir-181d
CEBPA	hsa-mir-1
EGFR	hsa-mir-1
EZH2	hsa-mir-1
FOXO3	hsa-mir-1
MRF4	hsa-mir-1
MYF5	hsa-mir-1
MYOD1	hsa-mir-1
MYOG	hsa-mir-1
NFE2L2	hsa-mir-1
PITX2	hsa-mir-1
SLUG	hsa-mir-1
STAT3	hsa-mir-1
YY1	hsa-mir-1
CEBPB	hsa-mir-143
DDX6	hsa-mir-143
ESR1	hsa-mir-143
EZH2	hsa-mir-143
FSH	hsa-mir-143
HIF1A	hsa-mir-143
IFNB1	hsa-mir-143
IFNG	hsa-mir-143
JAG1	hsa-mir-143
KLF2	hsa-mir-143
KLF4	hsa-mir-143
LIN28A	hsa-mir-143
MKL1	hsa-mir-143
MYB	hsa-mir-143
MYOCD	hsa-mir-143
N1ICD	hsa-mir-143
NKX2-5	hsa-mir-143
NR1H2	hsa-mir-143
RARA	hsa-mir-143
RREB1	hsa-mir-143
RXRA	hsa-mir-143
SMAD3	hsa-mir-143
SMAD4	hsa-mir-143
SRC	hsa-mir-143
SRF	hsa-mir-143
STAT3	hsa-mir-143
TGFB1	hsa-mir-143
TP53	hsa-mir-143
TP73	hsa-mir-143
HIF1A	hsa-mir-103
ZEB1	hsa-mir-103
ZEB2	hsa-mir-103
HIF1A	hsa-mir-107
LIN28A	hsa-mir-107
PPARA	hsa-mir-107
SREBF1	hsa-mir-107
TP53	hsa-mir-107
ZEB1	hsa-mir-107
ZEB2	hsa-mir-107
E2F1	hsa-mir-15a
E2F3	hsa-mir-15a
E2F7	hsa-mir-15a
KLF4	hsa-mir-15a
MYB	hsa-mir-15a
MYC	hsa-mir-15a
PAX5	hsa-mir-15a
PRKCA	hsa-mir-15a
REPIN1	hsa-mir-15a
STAT3	hsa-mir-15a
STAT5	hsa-mir-15a
TP53	hsa-mir-15a
AP-1	hsa-mir-21
AR	hsa-mir-21
BMP6	hsa-mir-21
BMPR1A	hsa-mir-21
BMPR1B	hsa-mir-21
CREB1	hsa-mir-21
CREBBP	hsa-mir-21
DDX5	hsa-mir-21
DTX1	hsa-mir-21
EGFR	hsa-mir-21
EP300	hsa-mir-21
ESR1	hsa-mir-21
ETS1	hsa-mir-21
ETV5	hsa-mir-21
FOS	hsa-mir-21
FOXO3	hsa-mir-21
GFI1	hsa-mir-21
GRHL3	hsa-mir-21
HIF1A	hsa-mir-21
HOXA9	hsa-mir-21
IL1B	hsa-mir-21
JUN	hsa-mir-21
KLF4	hsa-mir-21
KLF9	hsa-mir-21
MEIS1	hsa-mir-21
NF-Y	hsa-mir-21
NFIB	hsa-mir-21
NFKB1	hsa-mir-21
PBX1	hsa-mir-21
PPARG	hsa-mir-21
PRDM1	hsa-mir-21
PTEN	hsa-mir-21
RAS/ERK	hsa-mir-21
REL	hsa-mir-21
RELA	hsa-mir-21
REST	hsa-mir-21
RUNX2	hsa-mir-21
SMAD3	hsa-mir-21
SPI1	hsa-mir-21
STAT3	hsa-mir-21
TCF4	hsa-mir-21
TCF7L2	hsa-mir-21
TGFB1	hsa-mir-21
TH	hsa-mir-21
ZBTB7A	hsa-mir-21
AKT2	hsa-mir-200a
ASCL2	hsa-mir-200a
BMP4	hsa-mir-200a
DNMT1	hsa-mir-200a
EED	hsa-mir-200a
EZH2	hsa-mir-200a
FOXF2	hsa-mir-200a
FOXM1	hsa-mir-200a
FUS	hsa-mir-200a
GATA3	hsa-mir-200a
GRHL2	hsa-mir-200a
HDAC1	hsa-mir-200a
HDAC2	hsa-mir-200a
HDAC4	hsa-mir-200a
HNF4A	hsa-mir-200a
JUN	hsa-mir-200a
KDM5B	hsa-mir-200a
KLF4	hsa-mir-200a
KLF5	hsa-mir-200a
MYB	hsa-mir-200a
NFKB1	hsa-mir-200a
PELP1	hsa-mir-200a
SIP1	hsa-mir-200a
SIX1	hsa-mir-200a
SLUG	hsa-mir-200a
SMAD3	hsa-mir-200a
SNAI1	hsa-mir-200a
SNAI2	hsa-mir-200a
SP1	hsa-mir-200a
TGFB1	hsa-mir-200a
TP53	hsa-mir-200a
TP63	hsa-mir-200a
TP73	hsa-mir-200a
TWIST1	hsa-mir-200a
ZEB1	hsa-mir-200a
ZEB2	hsa-mir-200a
CREB1	hsa-mir-15b
E2F1	hsa-mir-15b
E2F3	hsa-mir-15b
FSH	hsa-mir-15b
REL	hsa-mir-15b
STAT5	hsa-mir-15b
TP53	hsa-mir-15b
ZEB1	hsa-mir-15b
ZEB2	hsa-mir-15b
ASCL2	hsa-mir-141
BMI1	hsa-mir-141
BRD7	hsa-mir-141
CDK4	hsa-mir-141
CDKN2A	hsa-mir-141
EED	hsa-mir-141
EP300	hsa-mir-141
EZH2	hsa-mir-141
FOXM1	hsa-mir-141
FUS	hsa-mir-141
GRHL2	hsa-mir-141
HDAC2	hsa-mir-141
JUN	hsa-mir-141
KAT2B	hsa-mir-141
KDM5B	hsa-mir-141
KLF5	hsa-mir-141
KLF8	hsa-mir-141
MUC1	hsa-mir-141
MYB	hsa-mir-141
MYC	hsa-mir-141
PELP1	hsa-mir-141
PLK1	hsa-mir-141
SIP1	hsa-mir-141
SNAI1	hsa-mir-141
SNAI2	hsa-mir-141
SOX2	hsa-mir-141
SP1	hsa-mir-141
SPLUNC1	hsa-mir-141
SPRR2A	hsa-mir-141
TGFB1	hsa-mir-141
TP53	hsa-mir-141
TWIST1	hsa-mir-141
ZEB1	hsa-mir-141
ZEB2	hsa-mir-141
MRF4	hsa-mir-133a
MYF5	hsa-mir-133a
MYOD1	hsa-mir-133a
MYOG	hsa-mir-133a
TNFSF12	hsa-mir-133a
calcineurin	hsa-mir-133a
CEBPA	hsa-mir-181a
NF-Y	hsa-mir-181a
RPS6KA5	hsa-mir-181a
STAT3	hsa-mir-181a
TAL1	hsa-mir-181a
TP63	hsa-mir-181a
AKT1	hsa-mir-181c
CEBPB	hsa-mir-181c
EGR1	hsa-mir-181c
EPAS1	hsa-mir-181c
ETS1	hsa-mir-181c
HIF1A	hsa-mir-181c
NFE2L2	hsa-mir-181c
RUNX1	hsa-mir-181c
APEX1	hsa-mir-133b
AR	hsa-mir-133b
AR	hsa-mir-133b
MYOG	hsa-mir-133b
OGG1	hsa-mir-133b
TNFSF12	hsa-mir-133b
TP63	hsa-mir-133b
calcineurin	hsa-mir-133b
BCL2L2	hsa-mir-29c
EPAS1	hsa-mir-29c
FOXA2	hsa-mir-29c
HDAC4	hsa-mir-29c
HIF1A	hsa-mir-29c
MYC	hsa-mir-29c
NFE2L2	hsa-mir-29c
NFKB1	hsa-mir-29c
RELA	hsa-mir-29c
SP1	hsa-mir-29c
STAT3	hsa-mir-29c
TAL1	hsa-mir-29c
YY1	hsa-mir-29c
BRCA1	hsa-mir-152
DNMT1	hsa-mir-152
EGR1	hsa-mir-152
IL6	hsa-mir-152
MAFB	hsa-mir-506
NFKB1	hsa-mir-506
STAT4	hsa-mir-506
TP53	hsa-mir-506
EIF2C2	hsa-let-7d
LIN28	hsa-let-7d
LIN28B	hsa-let-7d
MITF	hsa-let-7d
MYC	hsa-let-7d
STAT3	hsa-let-7d
TGFB1	hsa-let-7d
TNF	hsa-let-7d
TRIM32	hsa-let-7d
CEBPA	hsa-mir-134
FOSL1	hsa-mir-134
HNF4A	hsa-mir-134
KLF4	hsa-mir-134
ETS1	hsa-mir-181b
EZH2	hsa-mir-181b
NF-Y	hsa-mir-181b
STAT3	hsa-mir-181b
AR	hsa-mir-145
BMP4	hsa-mir-145
CEBPB	hsa-mir-145
DDX6	hsa-mir-145
ESR1	hsa-mir-145
FOXO1	hsa-mir-145
HIF1A	hsa-mir-145
IFNB1	hsa-mir-145
IFNG	hsa-mir-145
JAG1	hsa-mir-145
KLF2	hsa-mir-145
KLF4	hsa-mir-145
MKL1	hsa-mir-145
MYOCD	hsa-mir-145
N1ICD	hsa-mir-145
NKX2-5	hsa-mir-145
NR1H2	hsa-mir-145
POU5F1	hsa-mir-145
PPARG	hsa-mir-145
RARA	hsa-mir-145
RELA	hsa-mir-145
RREB1	hsa-mir-145
RXRA	hsa-mir-145
SMAD3	hsa-mir-145
SMAD4	hsa-mir-145
SNAI2	hsa-mir-145
SRC	hsa-mir-145
SRF	hsa-mir-145
TGFB1	hsa-mir-145
TP53	hsa-mir-145
TP73	hsa-mir-145
VDR	hsa-mir-145
ZEB1	hsa-mir-145
ZEB2	hsa-mir-145
AKT1	hsa-mir-125b
CDX2	hsa-mir-125b
ESR1	hsa-mir-125b
EZH2	hsa-mir-125b
NFKB1	hsa-mir-125b
PPARG	hsa-mir-125b
PRDM1	hsa-mir-125b
STAT3	hsa-mir-125b
TP53	hsa-mir-125b
BMP4	hsa-mir-205
BRCA1	hsa-mir-205
DEC1	hsa-mir-205
HES1	hsa-mir-205
HIF1A	hsa-mir-205
PCGF2	hsa-mir-205
PKM	hsa-mir-205
RELA	hsa-mir-205
TGFB1	hsa-mir-205
TP53	hsa-mir-205
TP63	hsa-mir-205
TP73	hsa-mir-205
TWIST1	hsa-mir-205
ZEB1	hsa-mir-205
FOXO3	hsa-mir-34b
SNAI1	hsa-mir-34b
TP53	hsa-mir-34b
ZEB1	hsa-mir-34b
AKT2	hsa-mir-200c
ASCL2	hsa-mir-200c
BMI1	hsa-mir-200c
BMP4	hsa-mir-200c
EED	hsa-mir-200c
EHMT2	hsa-mir-200c
EP300	hsa-mir-200c
ERG	hsa-mir-200c
EZH2	hsa-mir-200c
FOXM1	hsa-mir-200c
GATA3	hsa-mir-200c
GRHL2	hsa-mir-200c
HDAC2	hsa-mir-200c
HNF4A	hsa-mir-200c
JUN	hsa-mir-200c
KAT2B	hsa-mir-200c
KDM1A	hsa-mir-200c
KDM5B	hsa-mir-200c
KLF4	hsa-mir-200c
KLF5	hsa-mir-200c
LIN28A	hsa-mir-200c
MUC1	hsa-mir-200c
MYB	hsa-mir-200c
MYC	hsa-mir-200c
NCOR1	hsa-mir-200c
NFE2L2	hsa-mir-200c
NR5A2	hsa-mir-200c
PELP1	hsa-mir-200c
PLK1	hsa-mir-200c
PPARA	hsa-mir-200c
SIP1	hsa-mir-200c
SIX1	hsa-mir-200c
SLUG	hsa-mir-200c
SNAI1	hsa-mir-200c
SNAI2	hsa-mir-200c
SOX2	hsa-mir-200c
SP1	hsa-mir-200c
SPRR2A	hsa-mir-200c
STAT3	hsa-mir-200c
TGFB1	hsa-mir-200c
TP53	hsa-mir-200c
TWIST1	hsa-mir-200c
UBE2I	hsa-mir-200c
ZEB1	hsa-mir-200c
ZEB2	hsa-mir-200c
